# Supplementary material for: Importance of Utilizing Non-Communicable Disease Screening Tools; Ward-Based Community Health Care Workers of South Africa Explain
Source: MDPI journal article supplement (doi:10.3390/ijerph21030263), 2024-02-24
Supplement: s1 [file s1]

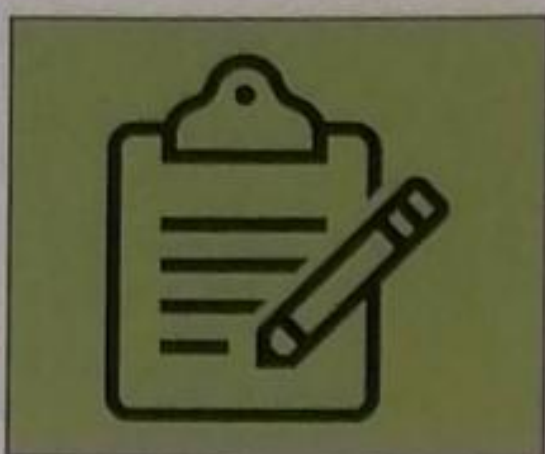

## High Blood Pressure Screening Tool

*Read the following questions to your clients. Refer them to the clinic for a blood pressure check if the answer to ANY of the questions is YES.*

| Question                                                                      | YES | NO |
|-------------------------------------------------------------------------------|-----|----|
| 1. Do you have very bad headaches?                                            | Y   | N  |
| 2. Do you feel tired or confused?                                             | Y   | N  |
| 3. Do you feel dizzy?                                                         | Y   | N  |
| 4. Do you feel like vomiting?                                                 | Y   | N  |
| 5. Do you have blurry eyesight?                                               | Y   | N  |
| 6. Do you have chest pains?                                                   | Y   | N  |
| 7. Do you have shortness of breath?                                           | Y   | N  |
| 8. Does it feel like your heart is beating too fast?                          | Y   | N  |
| 9. Is there blood in your urine?                                              | Y   | N  |
| 10. Do you feel a pounding in the chest, in your neck or ringing in the ears? | Y   | N  |
| 11. Do you have swollen ankles?                                               | Y   | N  |

**Note to CHW:** ONLY a clinical health worker can diagnose high blood pressure.

See Health For All Health Promotion Tool pages 134-137 for more on high blood pressure.



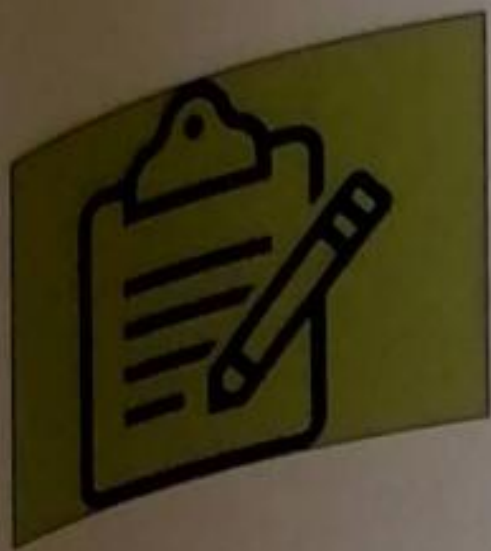

## Warning Signs for Diabetes Checklist

| Warning Signs                                                      | YES | NO |
|--------------------------------------------------------------------|-----|----|
| Do you feel very thirsty?                                          | Y   | N  |
| Do you urinate a lot?                                              | Y   | N  |
| Do you feel very tired a lot of the time?                          | Y   | N  |
| Do you feel very hungry a lot of the time?                         | Y   | N  |
| Are you losing weight without trying to?                           | Y   | N  |
| Do you have blurry eyesight?                                       | Y   | N  |
| Do you have dry, itchy skin?                                       | Y   | N  |
| Do you have sores that take a long time to heal?                   | Y   | N  |
| Are you losing feeling or getting a tingling feeling in your feet? | Y   | N  |

Make sure that household members understand the importance of getting help as soon as possible if they have

**ANY** of these signs, especially if they have any of the risk factors for diabetes.

See Health For All Health Promotion Tool pages 138-143 for more on diabetes.



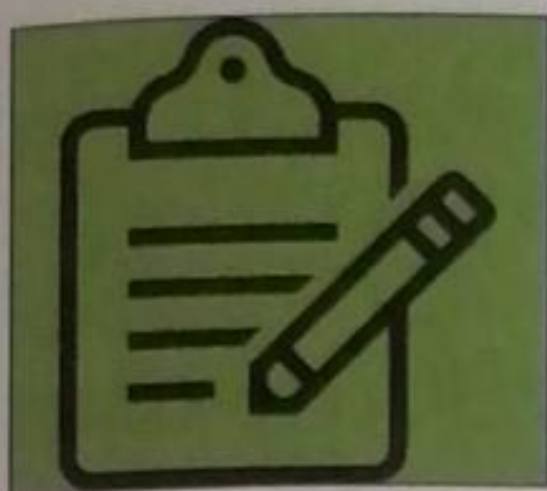

## Pregnancy Screening Tool

*Read the following questions to your female clients, ages 14-45 or as appropriate. Refer them to the clinic for a pregnancy test if the answer to Question 1 shows that they have missed a period and the answer to ANY of the other questions is YES.*

| Question                                                                                                                                                                                                                            |              |                |
|-------------------------------------------------------------------------------------------------------------------------------------------------------------------------------------------------------------------------------------|--------------|----------------|
| 1. When was the first day of your last normal menstrual period? (Your normal period is the period you have every month; this may be different from other women, e.g. the flow may be heavier, the number of days may be different.) | Day<br>_____ | Month<br>_____ |
| Question                                                                                                                                                                                                                            | YES          | NO             |
| 2. Have you been having sex without using any form of contraceptive?                                                                                                                                                                | Y            | N              |
| 3. Are your breasts tender?                                                                                                                                                                                                         | Y            | N              |
| 4. Have you been feeling nauseous?                                                                                                                                                                                                  | Y            | N              |
| 5. Do you feel tired all the time?                                                                                                                                                                                                  | Y            | N              |

**Note to the CHW:** Use the Pregnancy Planner Wheel to determine whether the date of last menstrual period indicates a missed period and possible pregnancy.



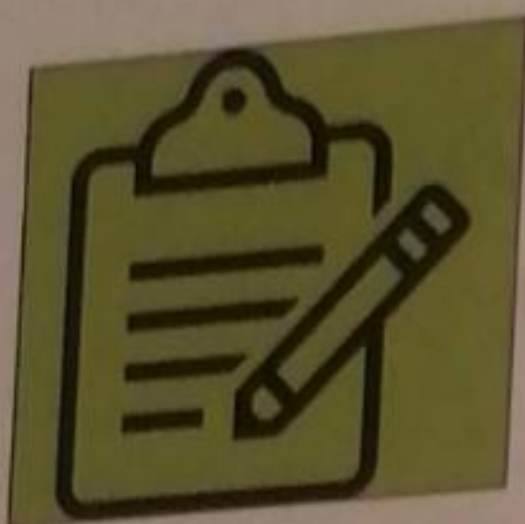

## TB Screening Tool for Adults

*Read the following questions to all individuals in the household and refer them to the clinic for TB testing if you tick YES (in the coloured blocks) for any answer.*

| Question                                                                | YES | NO |
|-------------------------------------------------------------------------|-----|----|
| 1. Do you have a cough?                                                 | Y   | N  |
| If YES, ask: For how long have you been coughing?                       |     |    |
| 2. Do you have a fever?                                                 | Y   | N  |
| If YES, ask: For how long have you had a fever?                         |     |    |
| 3. Have you lost weight?                                                | Y   | N  |
| If YES, ask: What do you think might be the cause of you losing weight? |     |    |
| 4. Are you sweating a lot at night?                                     | Y   | N  |

**Note to the CHW:** Please read the following to the community member.

If you are HIV-positive and you have been coughing for 24 hours, you should go to the clinic as soon as possible for a TB test.

If you are HIV-positive, you should be screened for TB whenever you go for your check-up appointments at the clinic.

**See Health For All Health Promotion Tool pages 130-133 for more on TB.**



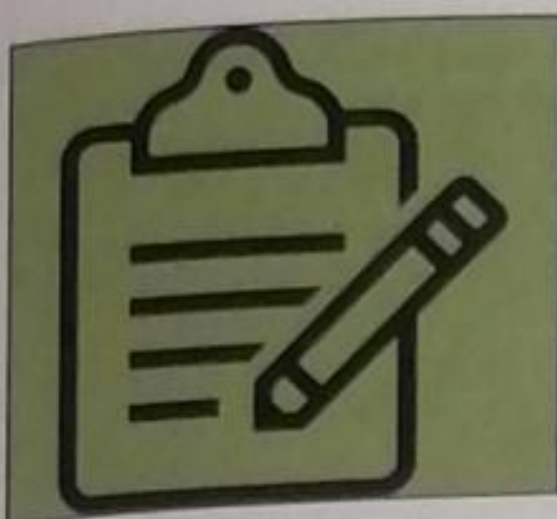

## TB Screening Tool for Children

*Read the following questions to any child and/or their caregiver in the household and refer them to the clinic for TB testing if you tick YES (in the coloured blocks) for any answer.*

| Question                                                                                       | YES | NO |
|------------------------------------------------------------------------------------------------|-----|----|
| 1. Do you have a cough? / Does the child have a cough that has not improved despite treatment? | Y   | N  |
| If YES, ask: For how long have you/has she or he been coughing?                                |     |    |
| 2. Do you have a fever? / Does the child have a fever                                          | Y   | N  |
| If YES, ask: For how long have you/has she or he had a fever?                                  |     |    |
| 3. Have you lost weight? / Has the child lost weight?                                          | Y   | N  |
| If YES, ask: What do you think might be the cause of you/she or he losing weight?              |     |    |
| 4. Are you feeling tired? / Has the child been feeling tired or been less playful?             | Y   | N  |

See Health For All Health Promotion Tool pages 130-133 for more on TB.



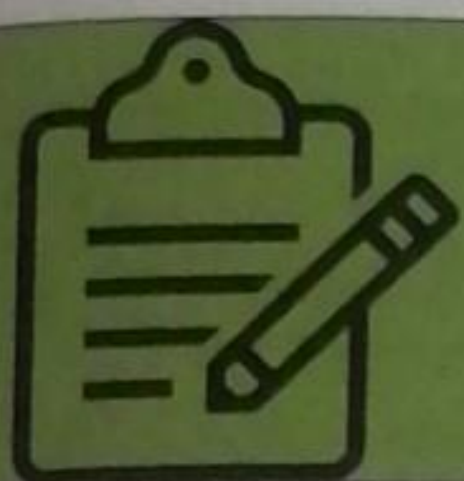

## Treatment Adherence Checklist

|                                                                                       | Done | Not Done |
|---------------------------------------------------------------------------------------|------|----------|
| <b>Reviews treatment history, including:</b>                                          |      |          |
| • Current regimen                                                                     |      |          |
| • Side effects                                                                        |      |          |
| • Other treatments                                                                    |      |          |
| <b>Discusses current health status with patient, including:</b>                       |      |          |
| • Overall health and current problems                                                 |      |          |
| • Latest relevant laboratory tests (e.g. CD4 count)                                   |      |          |
| • Goals for health                                                                    |      |          |
| <b>Assesses patient's medication knowledge, behaviours, and attitudes, including:</b> |      |          |
| • Knowledge of HIV/TB/other medications                                               |      |          |
| • Understanding of drug resistance and implications                                   |      |          |
| • Attitudes about taking medications                                                  |      |          |
| <b>Reviews patient's/family's living situation, including:</b>                        |      |          |
| • Daily activities: work, school and travel schedule                                  |      |          |
| • Eating patterns                                                                     |      |          |
| • Access to health centre                                                             |      |          |
| • Special factors: disclosure of diagnosis, medication storage issues                 |      |          |
| <b>Describes proposed medication regimen, including:</b>                              |      |          |
| • Drug names                                                                          |      |          |
| • Dosing                                                                              |      |          |
| • Food requirements                                                                   |      |          |
| • Special instructions/how to give                                                    |      |          |
